# Supplementary material for: Deep sequencing shows microRNA involvement in bovine mammary gland adaptation to diets supplemented with linseed oil or safflower oil
Source: PubMed Central journal article supplement (PMC4628385; doi:10.1186/s12864-015-1965-7), 2015-10-30
Supplement: 12864_2015_1965_MOESM11_ESM.pdf [file 12864_2015_1965_MOESM11_ESM.pdf]

**Additional file 11a-d:**

**Functional annotation of the targets of differentially expressed miRNAs in each of the treatments**

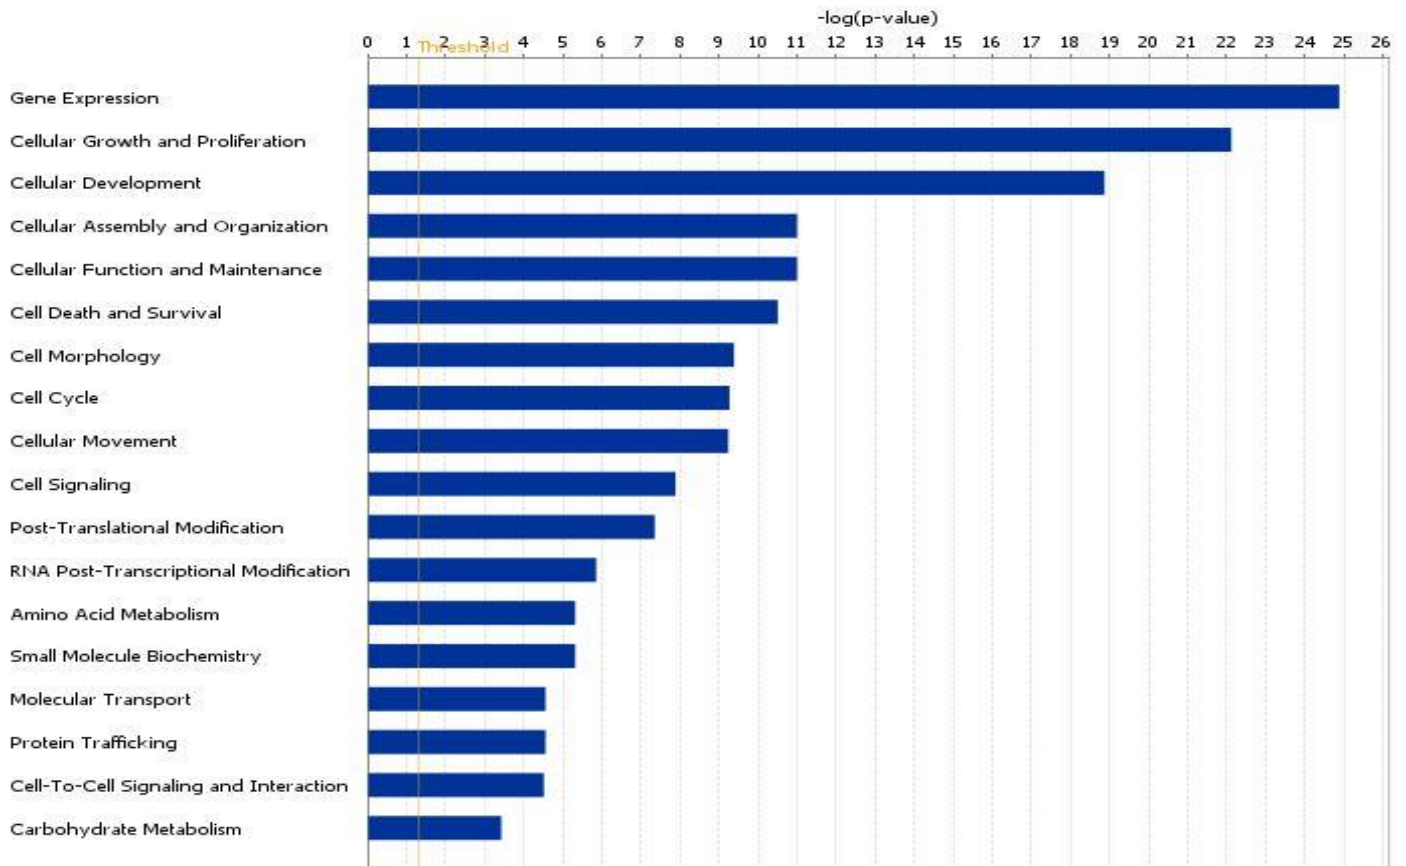

**(A). Enriched functions of targets of up-regulated miRNAs in linseed group**

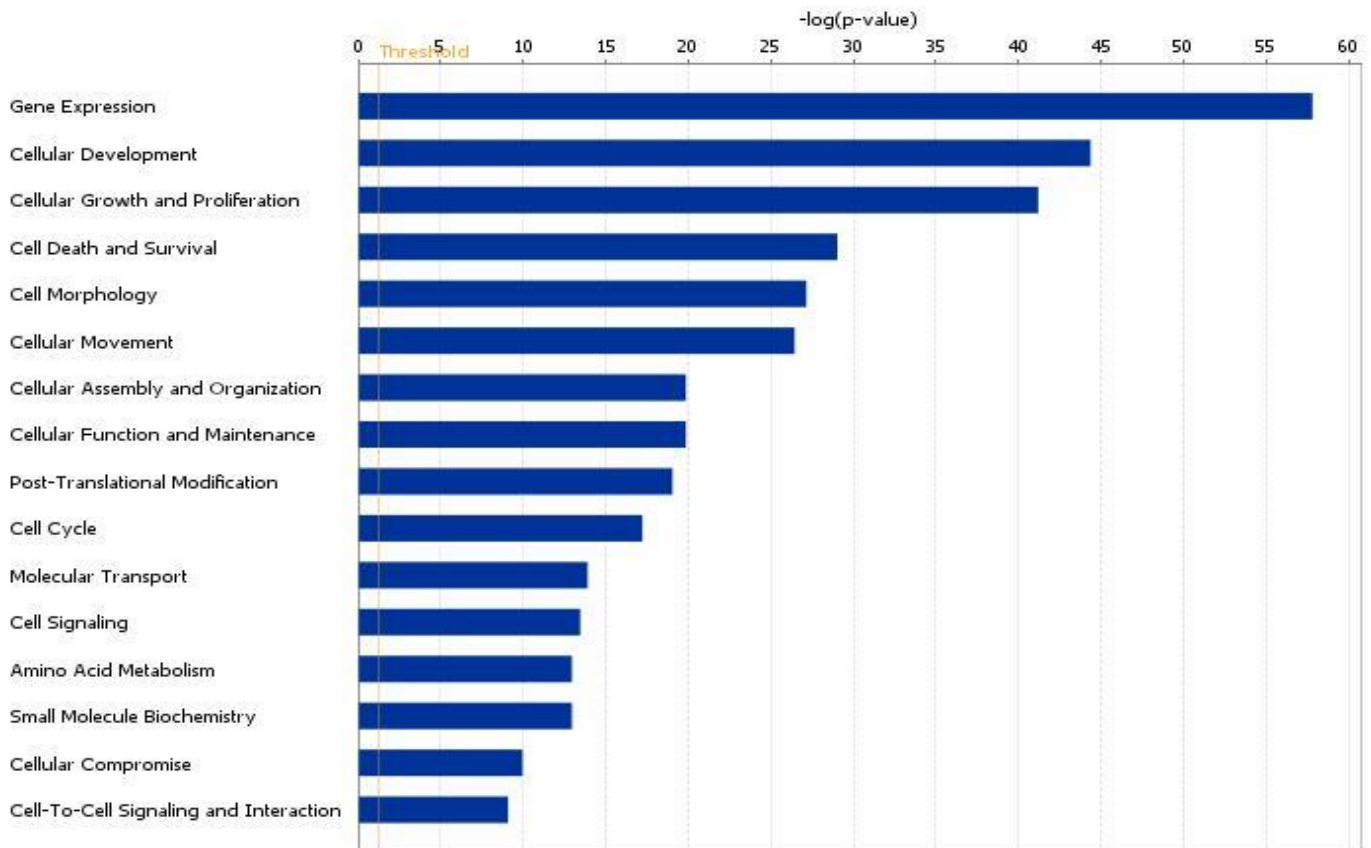

**(B). Enriched functions of targets of down-regulated miRNAs in linseed group**

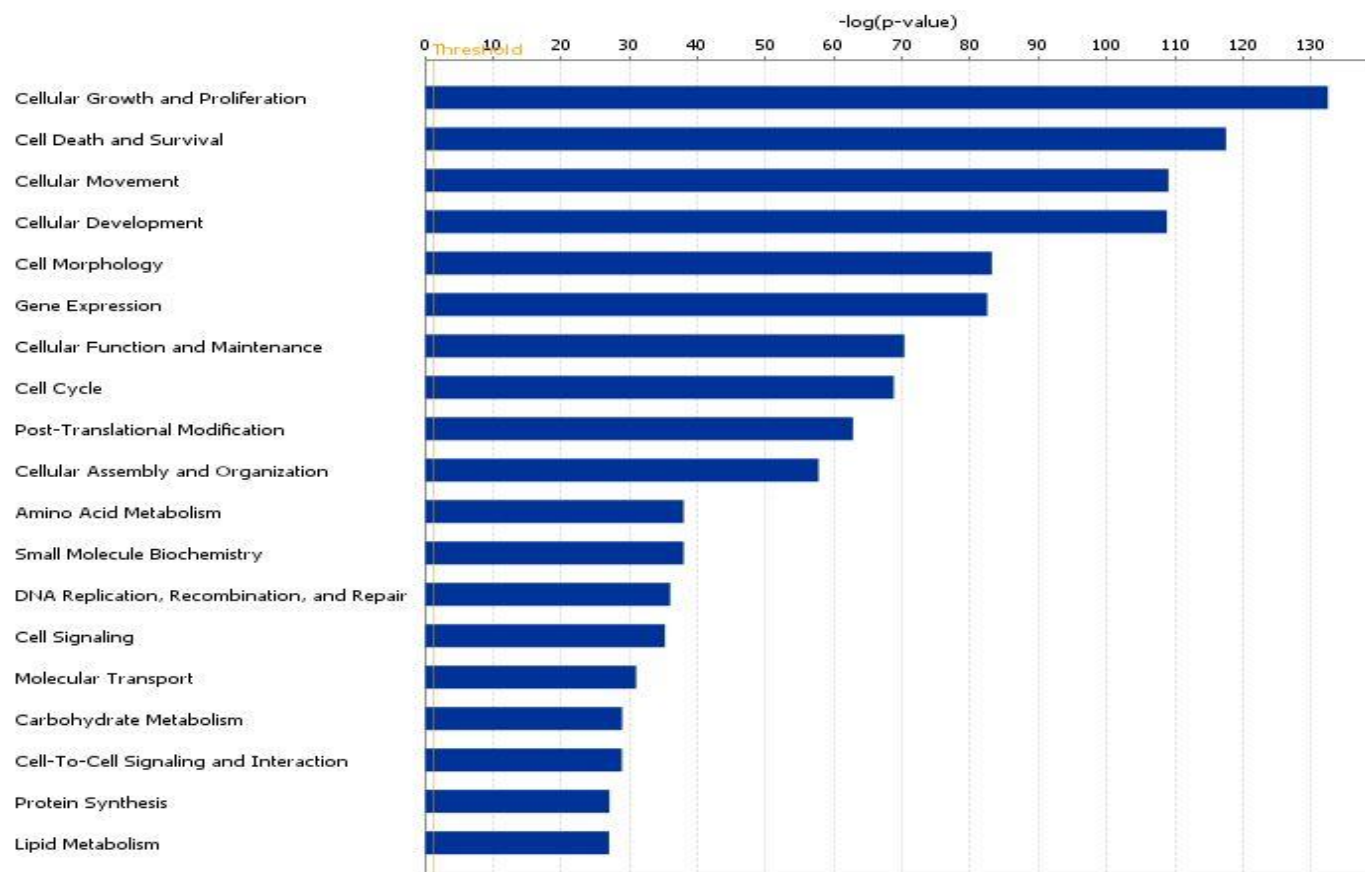

(C). Enriched functions of targets of un-regulated miRNAs in safflower group

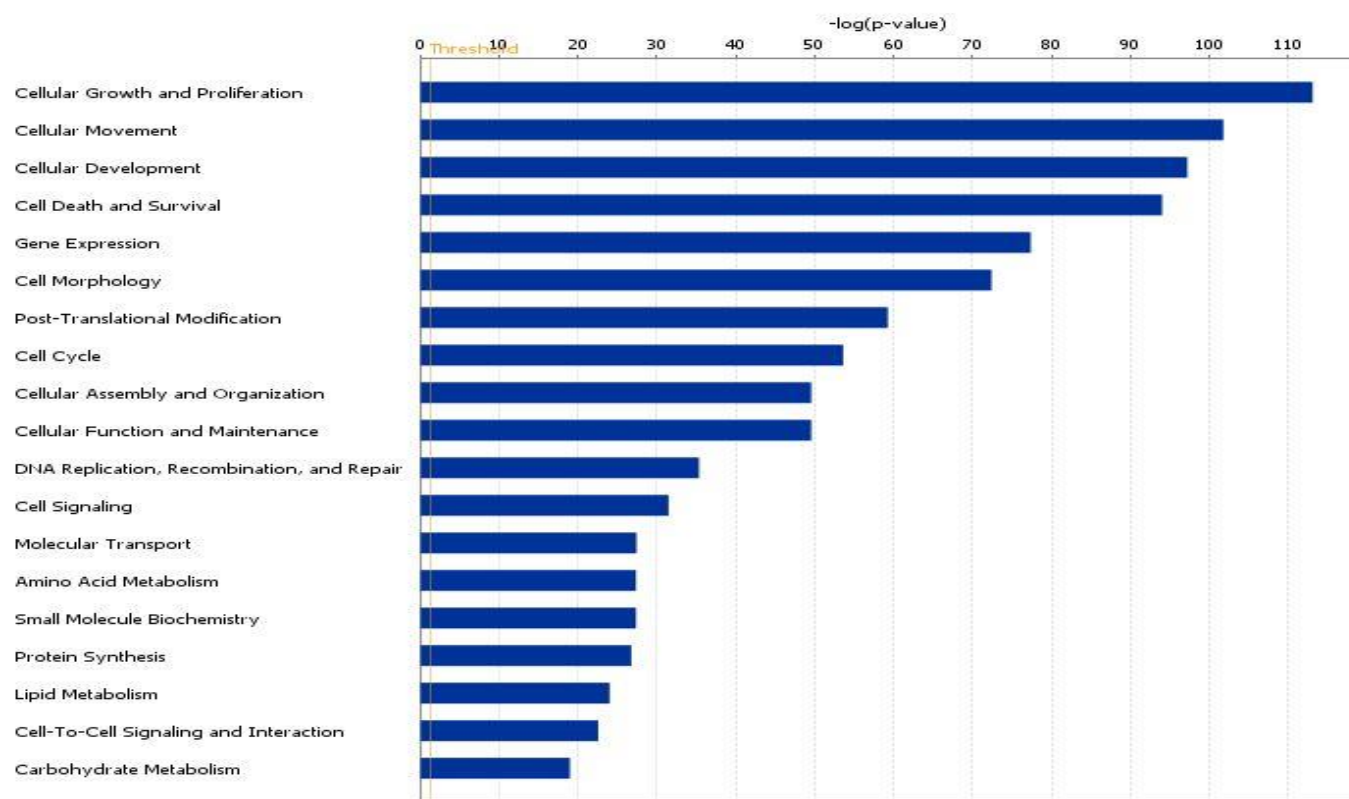

(D). Enriched functions of targets of down-regulated miRNAs in safflower group
